# Supplementary material for: GRAF1 deficiency blunts sarcolemmal injury repair and exacerbates cardiac and skeletal muscle pathology in dystrophin-deficient mice
Source: PubMed Central journal article supplement (PMC4546166; doi:10.1186/s13395-015-0054-6), 2015-08-21

Supplemental Data File for Lenhart et. al. contains 4 figures with accompanying legends

## Supplemental Figure Legends:

**Supplemental Figure 1.** TEM (2500X magnification) reveals T-tubule abnormalities in muscle from GRAF1-deficient mice.

### **Supplemental Figure 2: Graf1-depleted *mdx* mice exhibit increased muscle growth. (a)**

Representative images of 6 month old male mice with indicated genotypes. Note pronounced size increase of body (*top panels*), forelimbs (*middle panels*), and hindlimbs (*bottom panels*)

from Graf1<sup>Gt/Gt</sup>;X<sup>mdx</sup>Y mice compared to age-matched controls. **(b)** Comparison of

gastrocnemius muscles isolated from mice in panel A reveal marked muscle growth in

Graf1<sup>Gt/Gt</sup>;X<sup>mdx</sup>Y mice. **(c)** Average body mass of 6 month old male mice. Data are represented as mean ± s.e.m. (\**p*<0.005; \**p*<0.05; *N*=5 mice per genotype).

### **Supplemental Figure 3. GRAF1/dystrophin- depleted tibialis anterior muscles contain**

**smaller but more numerous fibers (a)** Representative cross-sectional images of tibialis

anterior muscle from 6 month male mice with indicated genotypes. Wheat germ agglutinin

(WGA, red) demarcates myofiber boundaries. Nuclei are counterstained with DAPI (blue). Note

increased fiber size variability in double deficient muscles. **(a, bottom)** Frequency histogram

demonstrates myofiber distribution by cross-sectional area (CSA). **(b)** Average myofiber CSA

(\**p*<0.001; *n*=350 myofibers per mouse; *N*=5 mice per genotype). **(c)** Average myofiber number

per 0.5 mm<sup>2</sup> (\**p*<0.05; *N*=5 mice per genotype). Data are represented as mean ± s.e.m. **(d)**

Graphical representation of the percentage of regenerating myofibers in the muscle (n.s.=no

significance; *n*=300 myofibers per mouse; *N*=5 mice per genotype). Data are represented as

mean ± s.e.m. Scale bars=100 μm.

**Supplemental Figure 4. Adult GRAF1/dystrophin- depleted diaphragms contain more**

**numerous fibers and exhibit signs of reduced regenerative capacity** (a) Quantification of

total number of diaphragm myofibers from 6 month old male mice ( $N=3-5$  mice per genotype).

(b) Diaphragm cross sections from 6 month old male mice with indicated genotypes

immunostained with eMHC (green) to demarcate regenerative fibers. Note marked reduction in regenerating fibers in the *mdx*/Graf1-deficient muscles (*arrows*). Scale bars=20  $\mu$ m. (c)

Percentage of regenerating myofibers in diaphragm muscles from 6 month old male mice as assessed by central nucleation ( $n=1,000$  myofibers per mouse;  $N=3-5$  mice per genotype).

n.s.=not significant. Data are represented as mean  $\pm$  s.e.m.

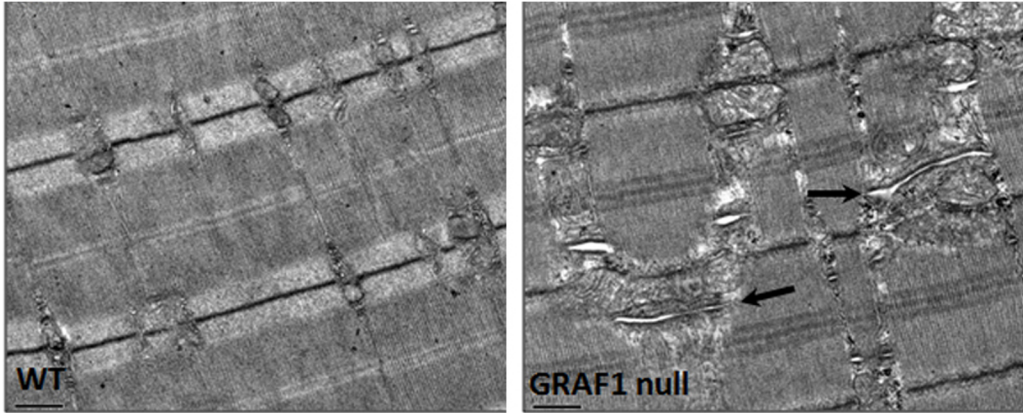

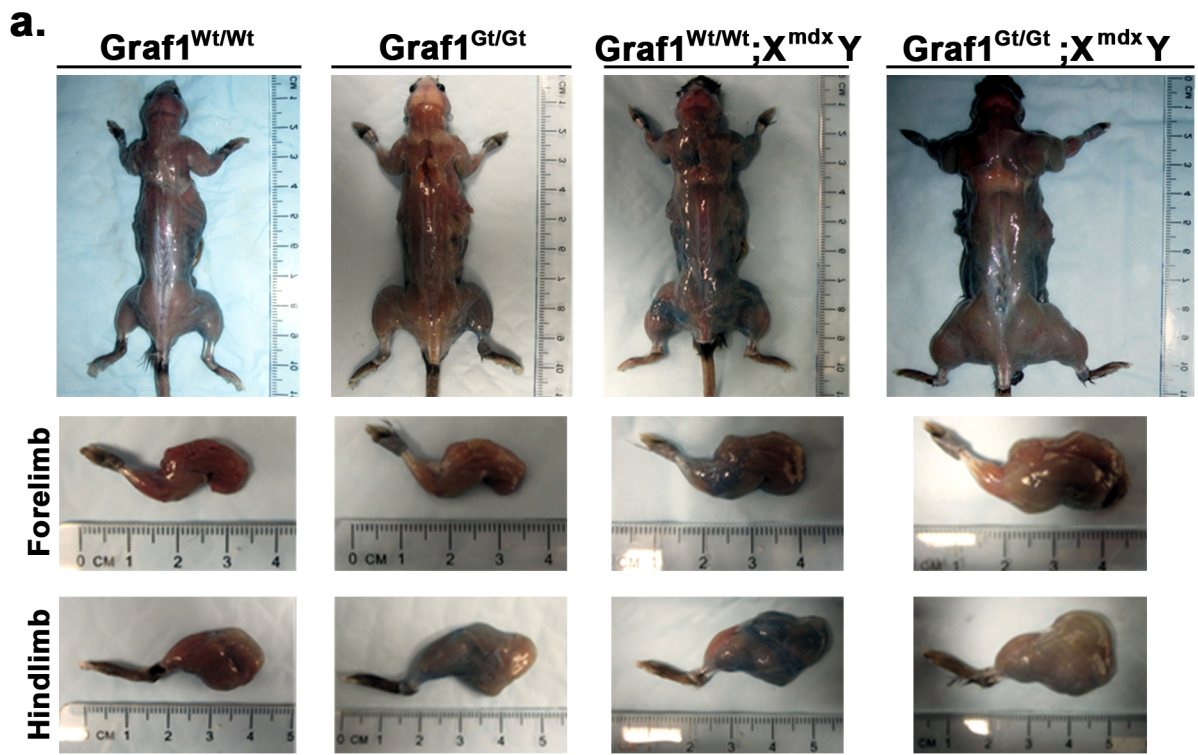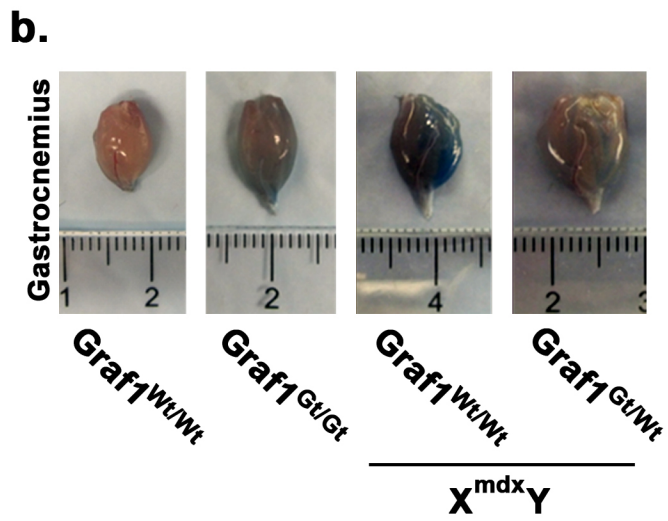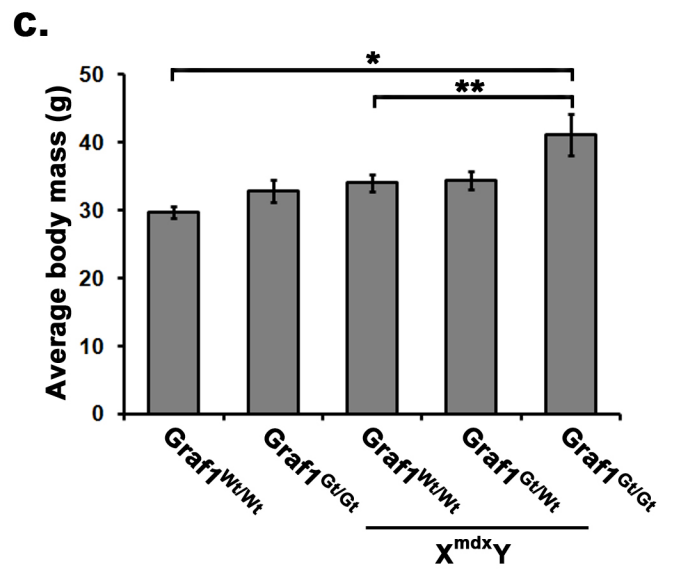

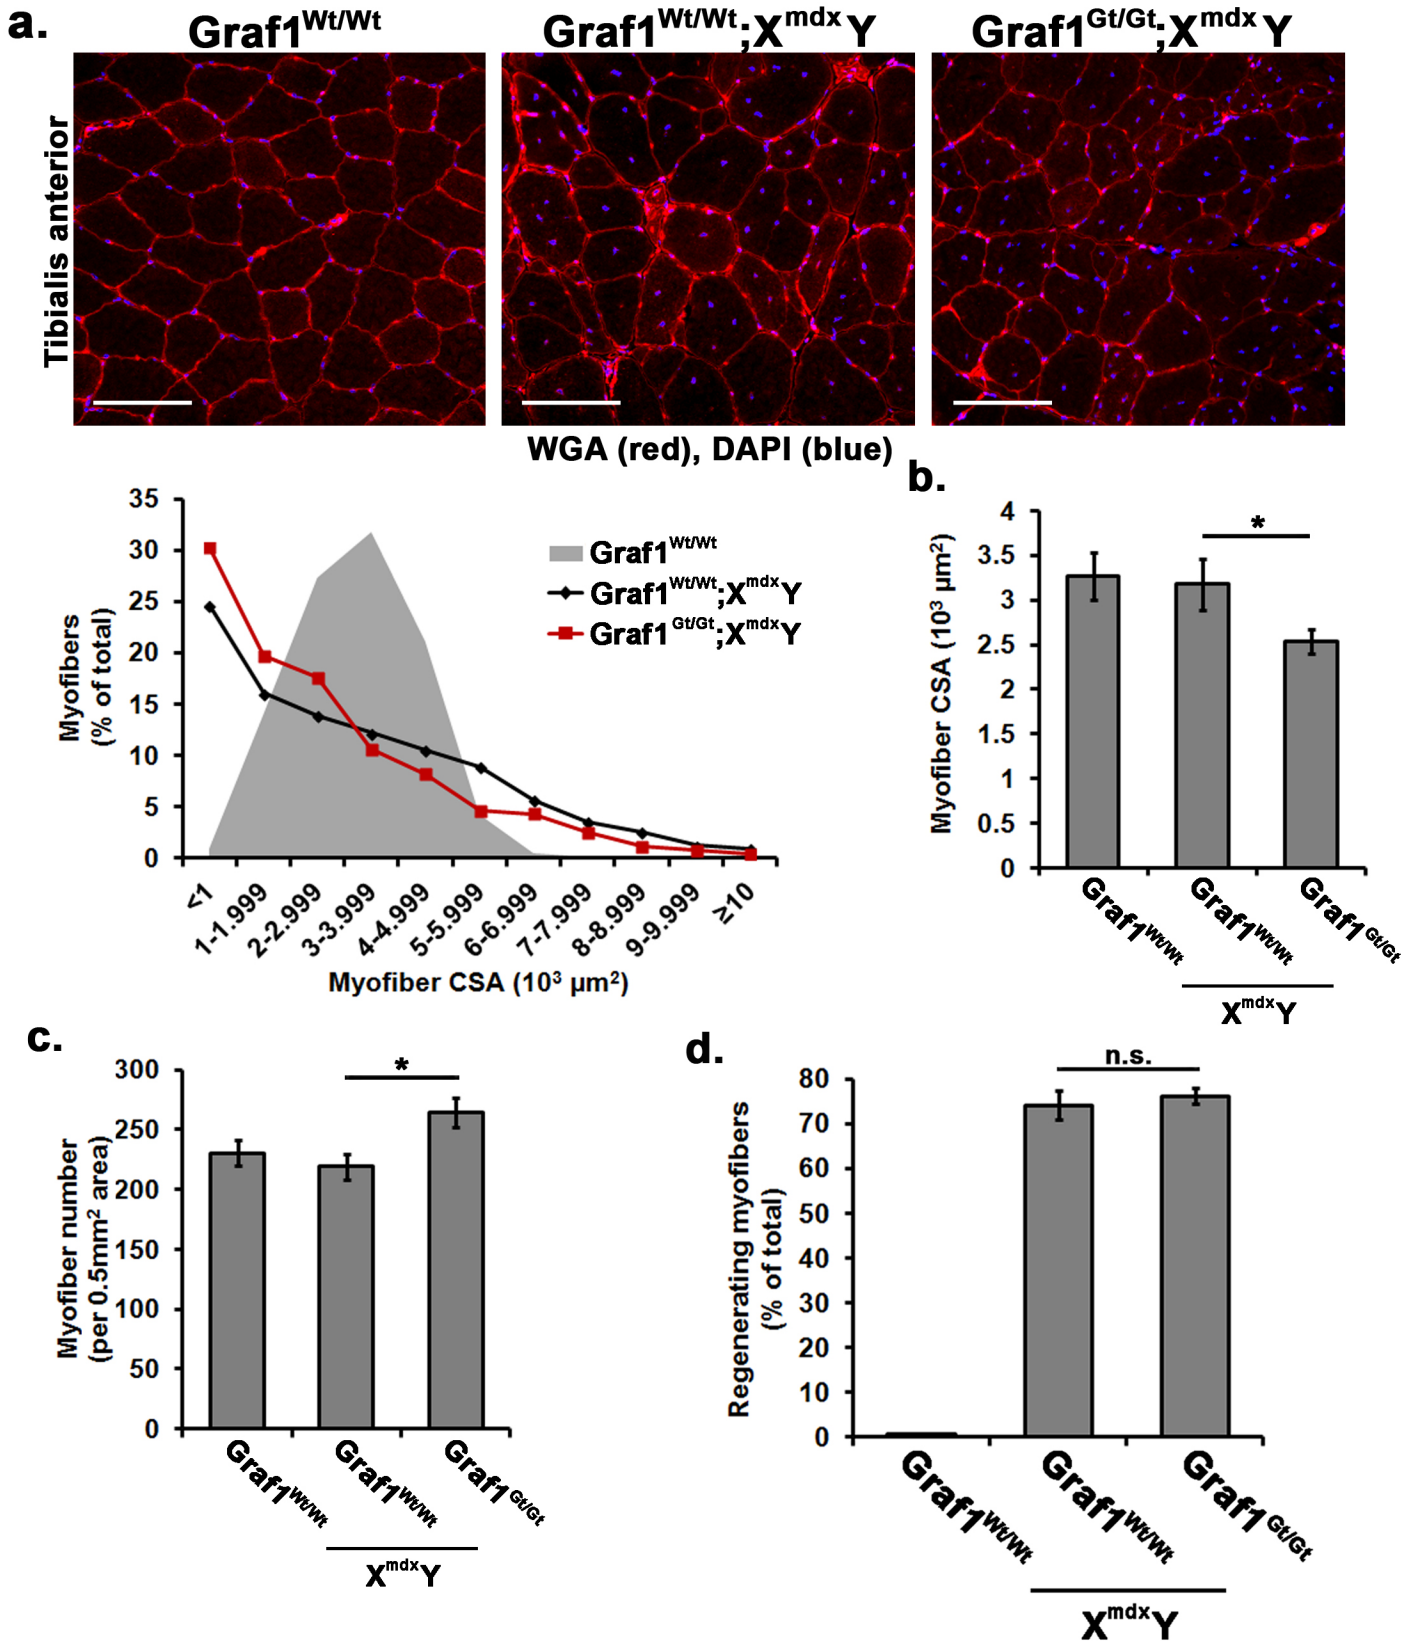

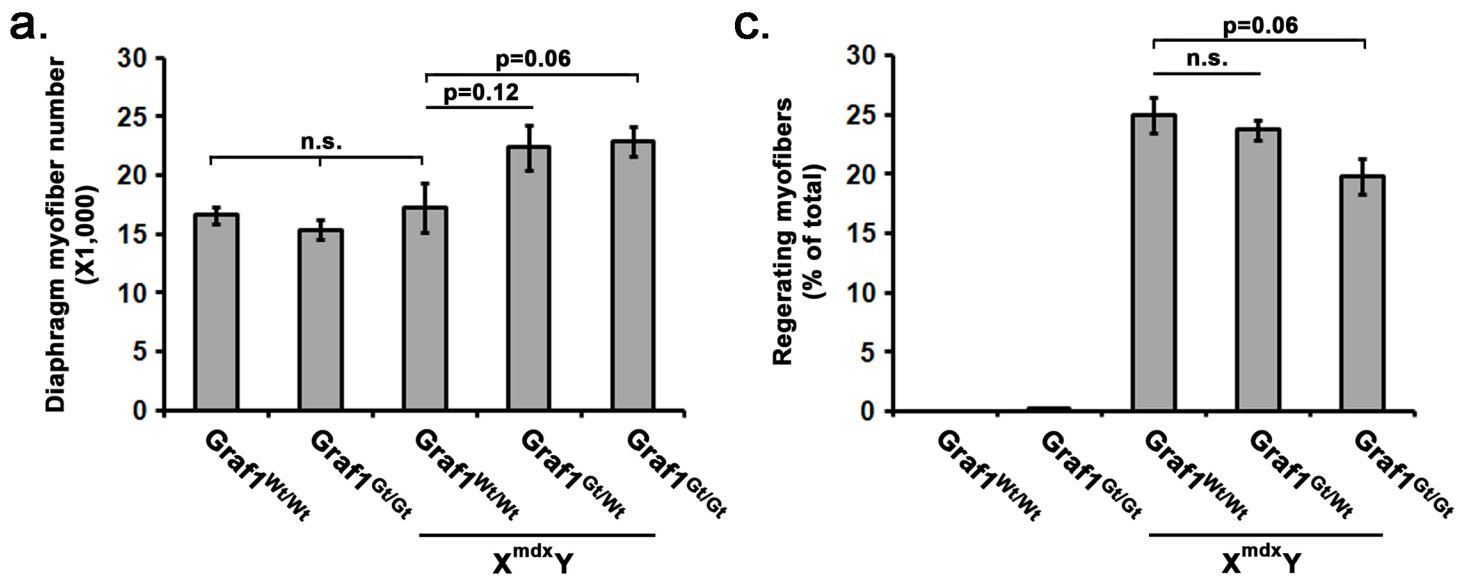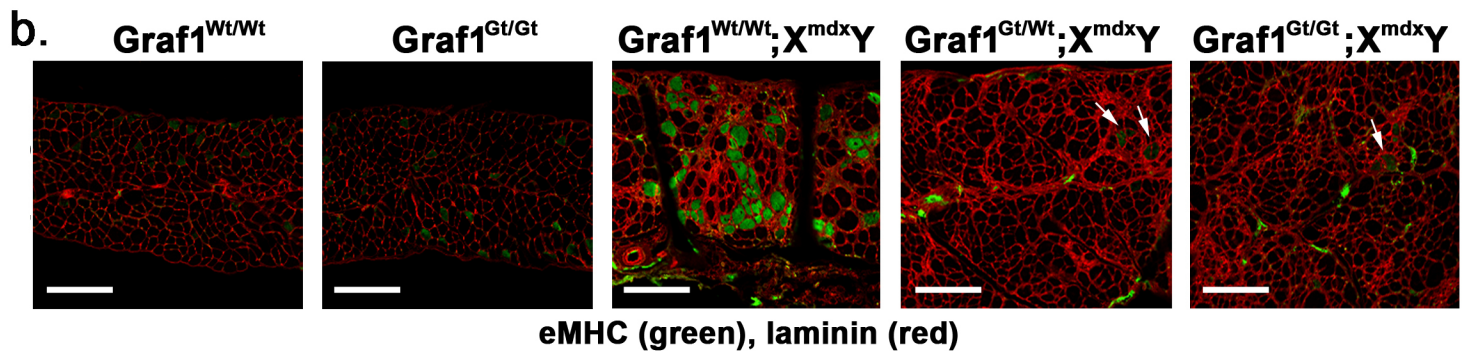

Supplement: 13395_2015_54_MOESM1_ESM.pdf [file 13395_2015_54_MOESM1_ESM.pdf]
